# Supplementary material for: Temporal migration patterns between natal locations of ruby-throated hummingbirds (Archilochus colubris) and their Gulf Coast stopover site
Source: Springer Nature journal article supplement (doi:10.1186/s40462-017-0120-2), 2018-01-09
Supplement: 40462_2017_120_MOESM5_ESM.pdf [file 40462_2017_120_MOESM5_ESM.pdf]

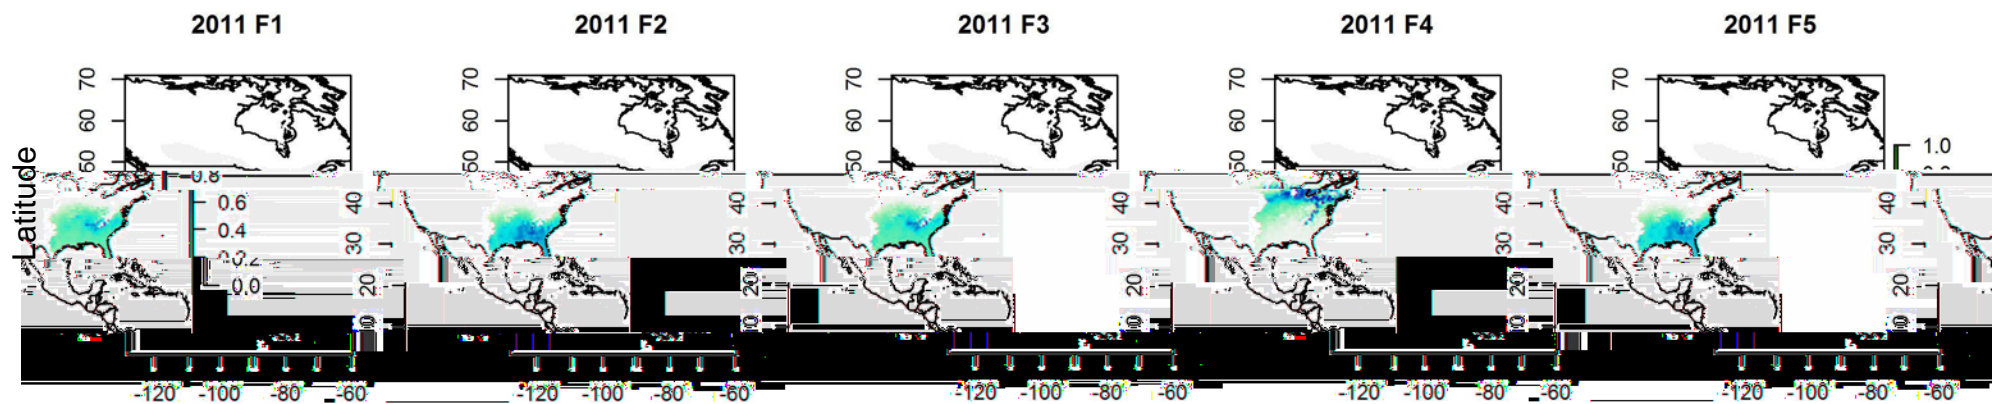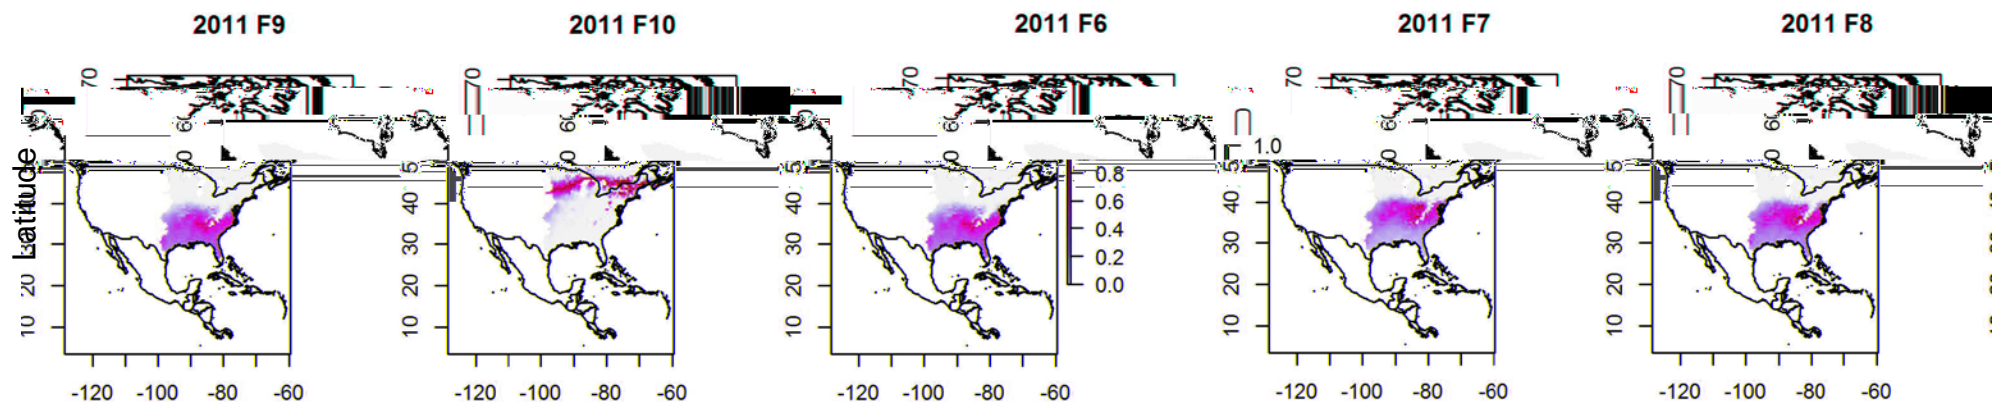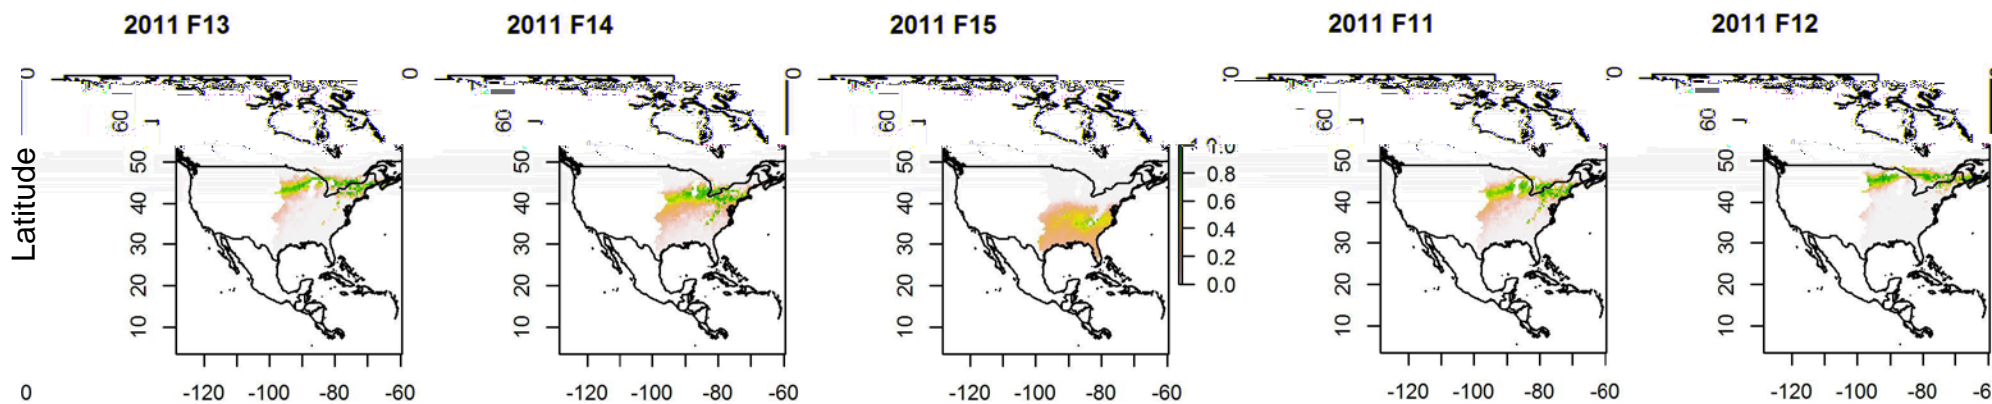

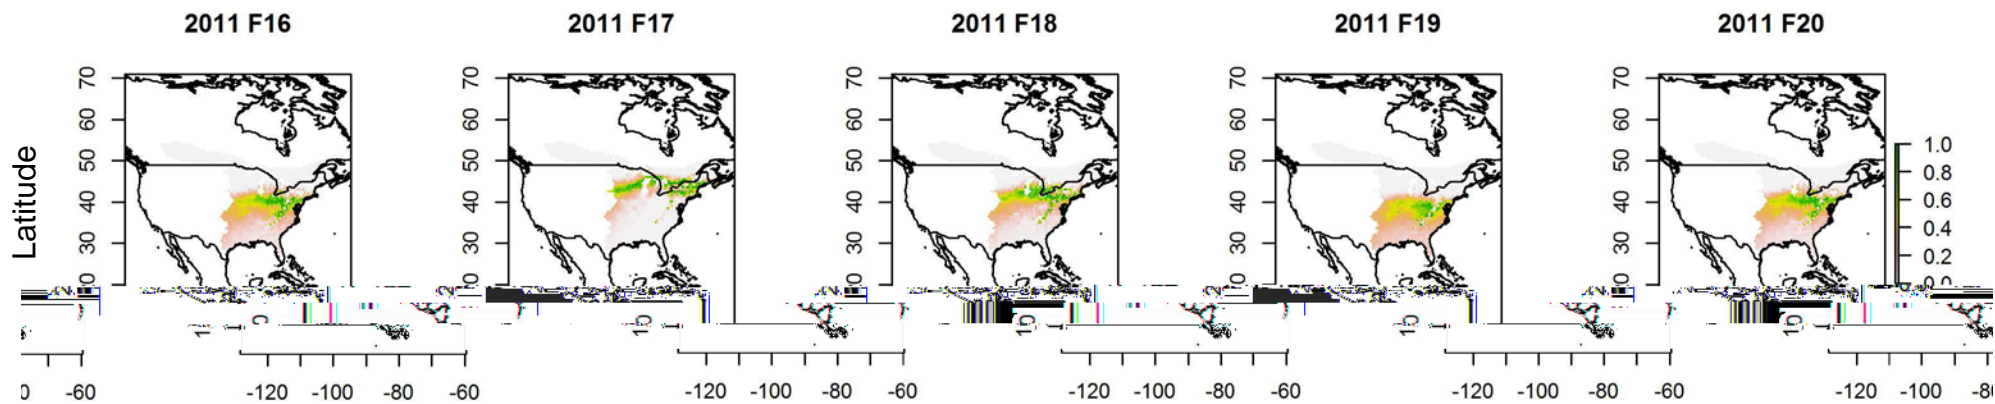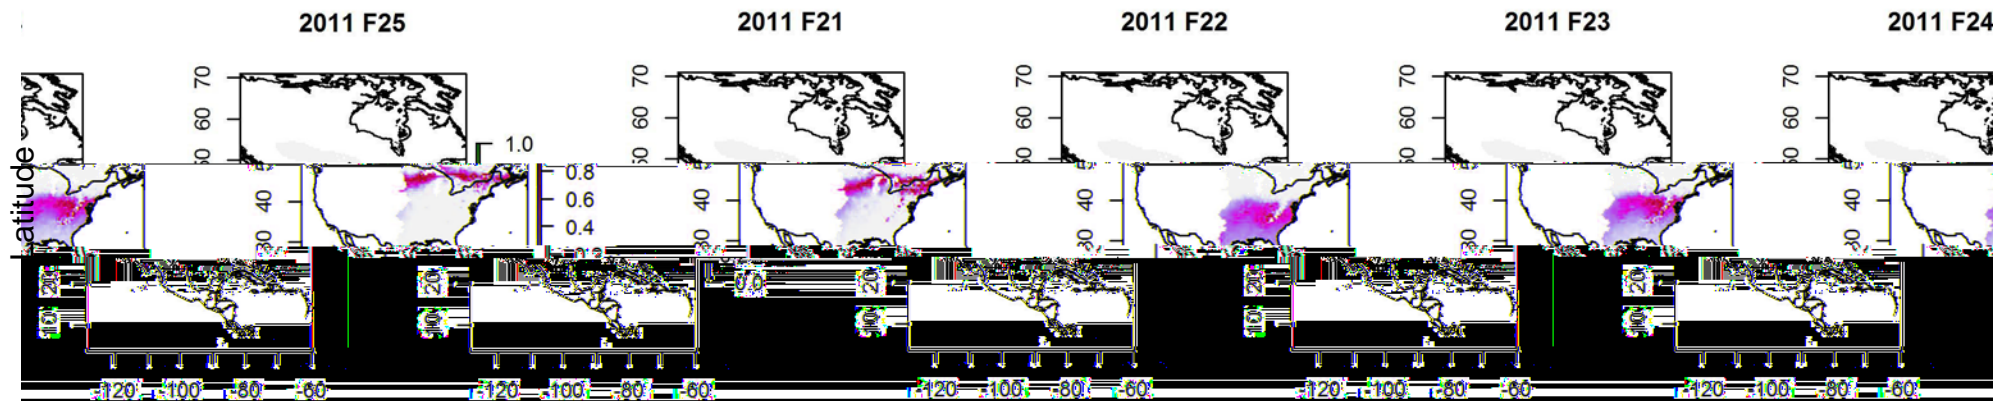

Longitude

Longitude
