# Supplementary material for: Temporal migration patterns between natal locations of ruby-throated hummingbirds (Archilochus colubris) and their Gulf Coast stopover site
Source: Springer Nature journal article supplement (doi:10.1186/s40462-017-0120-2), 2018-01-09
Supplement: 40462_2017_120_MOESM6_ESM.pdf [file 40462_2017_120_MOESM6_ESM.pdf]

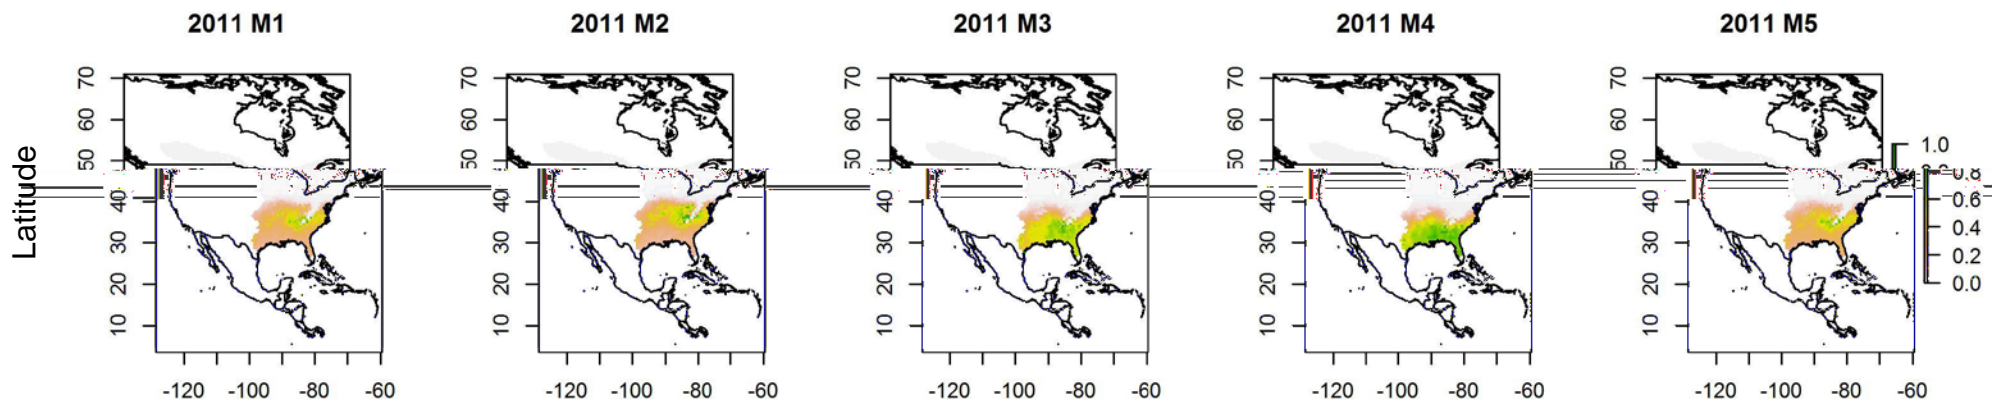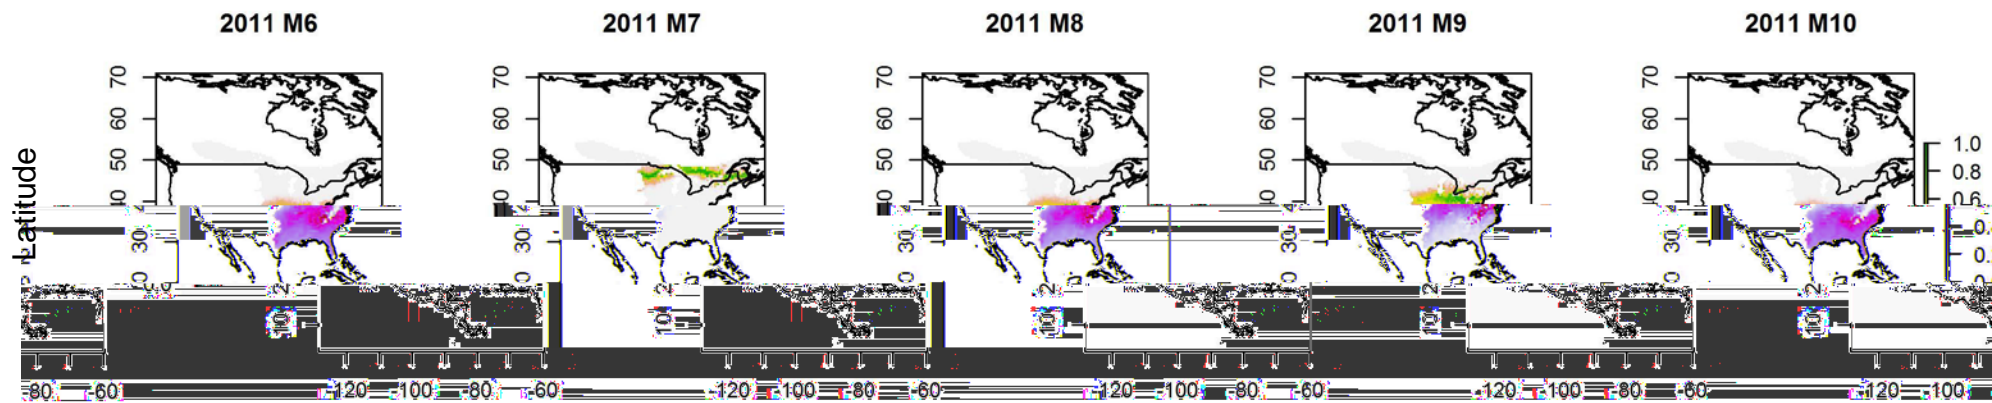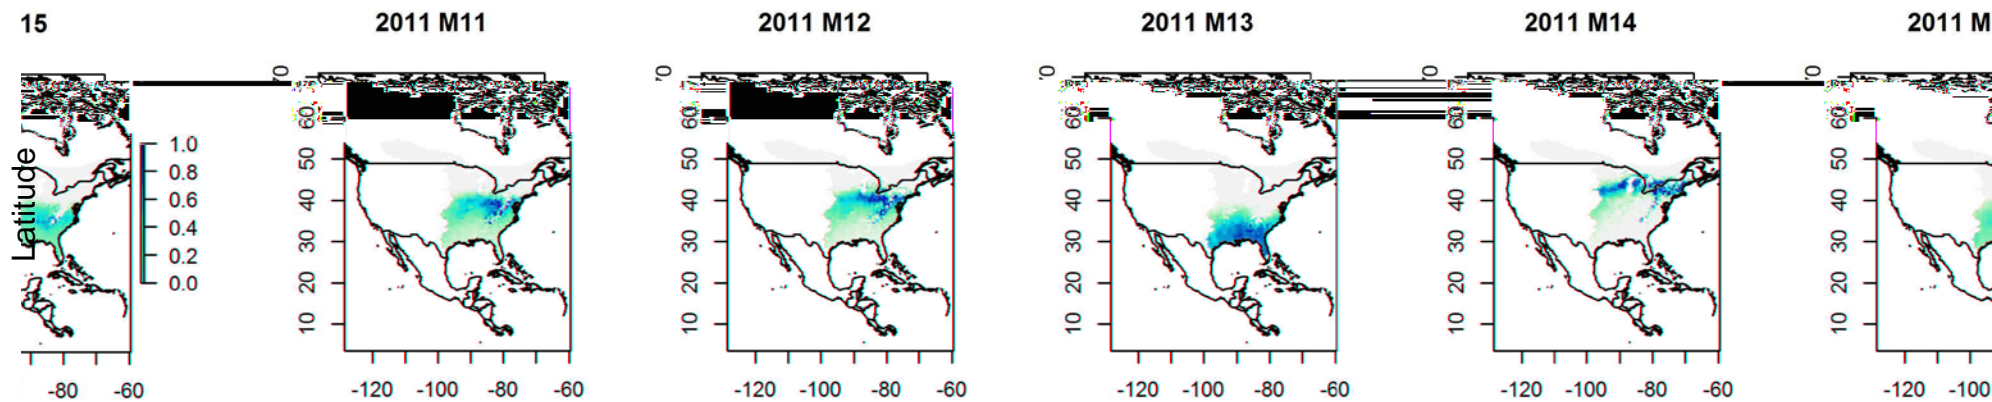

2011 M16

2011 M17

2011 M18

2011 M19

2011 M20

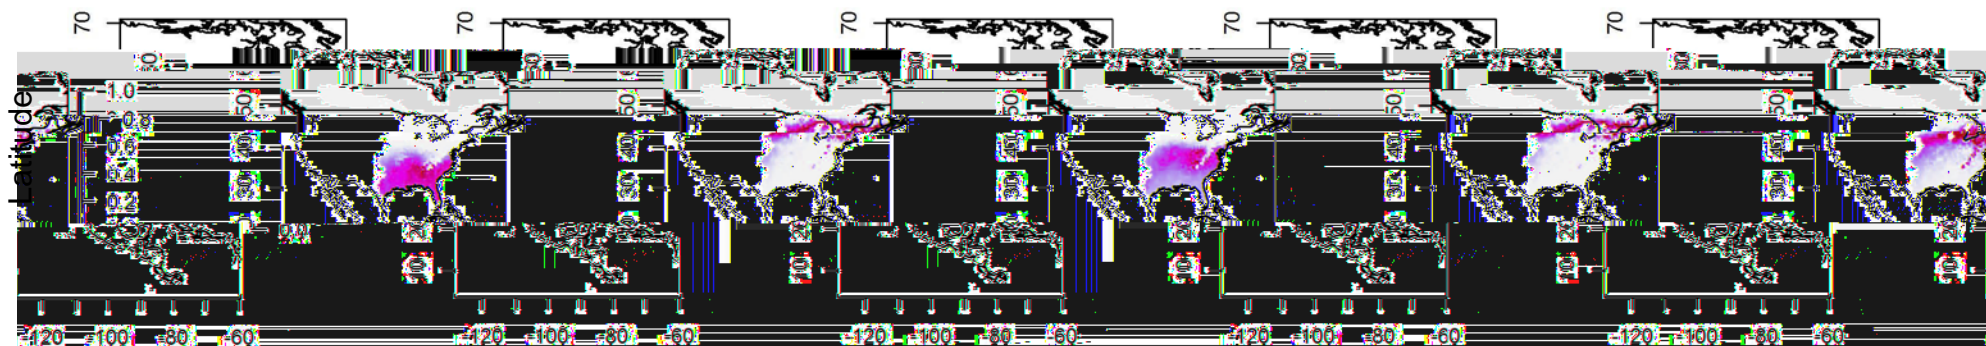

2011 M25

2011 M21

2011 M22

2011 M23

2011 M24

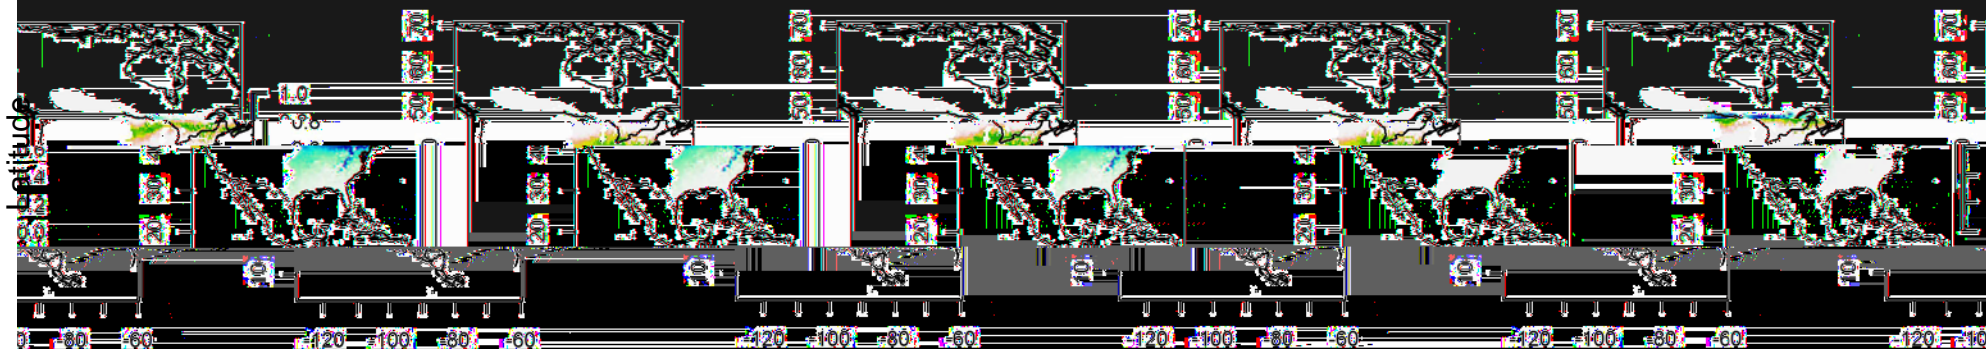

Longitude

Longitude
